# Supplementary material
Source: PubMed Central journal article supplement (PMC7542794)
Supplement: rspb20201320supp1.pdf [file rspb20201320supp1.pdf]

## Electronic Supplementary Material

### Subjects

We defined a nursery-reared (NR) chimpanzee as an individual that was separated from his or her mother within the first 30 days of life due to unresponsive care, injury, or illness (Bard, 1994; Bard, Platzman, Lester, & Suomi, 1992). NR chimpanzees were placed in incubators, fed standard human infant formula (not supplemented with DHA to our knowledge), and cared for by humans until they could sufficiently care for themselves, at which time they were placed with other infants of the same age until they were three years of age (Bard, 1994; Bard et al., 1992). At three years of age, the NR chimpanzees were integrated into larger social groups of adult and sub-adult chimpanzees. Mother-reared (MR) individuals were defined as individuals that were not separated from their mother for at least the first 2.5 years of life and were raised in social groups of between 4 -20 individuals. Wild caught individuals had unknown rearing history, which may have included pet ownership or use in the entertainment industry.

### MRI Scanning

*In vivo* scans were obtained at the time the chimpanzees were being surveyed for their annual physical examinations. All *in vivo* chimpanzee MRI scans were done prior to the 2015 implementation of United States Fish and Wildlife Service and National Institutes of Health regulations governing research with chimpanzees. Subjects were first immobilized with ketamine (10 mg/kg) or telazol (3-5mg/kg) and subsequently anaesthetized with propofol (40–60 mg/(kg/h)), following standard procedures at the

YNPRC and NCCC facilities. YNPRC subjects were then transported to the MRI facility, while NCCC subjects were wheeled to the mobile imaging unit. The subjects remained anaesthetized for the duration of the scans, as well as the time needed to transport them between their home cage and the imaging facility (between 5 and 10 minutes) or mobile imaging unit (total time ~ 5 minutes). Subjects were placed in the scanner chamber in a supine position with their head fitted inside the human-head coil. Scan duration ranged between 40 and 60 minutes as a function of brain size. After completing MRI procedures, the subjects were temporarily housed in a single enclosure for 6–12 h to allow the effects of the anesthesia to wear off, after which they were returned to their social group.

#### Sulci Extraction and Measurement

To account for the differences in chimpanzee anatomy compared to humans, a number of adjustments were performed before the scans were processed using the pipeline procedure within BrainVisa software (BV). Specifically, chimpanzee MRI volumes were skull-stripped, cropped, bias corrected (Coupé et al., 2008), and reformatted at 0.625 mm isotropic resolution using ANALYZE 11.0 software, and subsequently imported into BV. To align the template brain, the anterior and posterior commissures were manually specified on the MRI at the point where they intersect with the mid-sagittal slice.

#### Heritability Analyses

Total additive genetic variance ( $h^2$ ) is the amount of total phenotypic variance that is attributable to all genetic sources. Total phenotypic variance attributable to genetic and

non-genetic variables is constrained to a value of 1; therefore, all non-genetic contributions to the phenotype are equal to  $1 - h^2$ .

### References

1. Bard, K. A. (1994). Evolutionary roots of intuitive parenting: Maternal competence in chimpanzees. *Early Development and Parenting*, 3(1), 19-28. doi:10.1002/edp.2430030104
2. Bard, K. A., Platzman, K. A., Lester, B. M., & Suomi, S. J. (1992). Orientation to social and nonsocial stimuli in neonatal chimpanzees and humans. *Infant Behavior and Development*, 15(1), 43-56. doi:10.1016/0163-6383(92)90005-q
3. Bard, K. A. (1994). Evolutionary roots of intuitive parenting: Maternal competence in chimpanzees. *Early Development and Parenting*, 3(1), 19-28. doi:10.1002/edp.2430030104
4. Coupé, P., Yger, P., Prima, S., Hellier, P., Kervrann, C., & Barillot, C. (2008). An optimized blockwise nonlocal means denoising filter for 3-D magnetic resonance images. *IEEE transactions on medical imaging*, 27(4), 425-441.

### List of Tables

**Table S1: Descriptive data for planum temporale (PT) surface area and mean depth grouped by non-genetic factors (i.e., rearing history, colony, sex and scanner magnet strength).**

|                       | Mean AQ | s.e. | t     | p    | #L | #NB | #R |
|-----------------------|---------|------|-------|------|----|-----|----|
| <hr/>                 |         |      |       |      |    |     |    |
| <b>Scanner Magnet</b> |         |      |       |      |    |     |    |
| <i>Surface Area</i>   |         |      |       |      |    |     |    |
| 3T                    | -0.155  | .026 | -5.92 | .000 | 59 | 5   | 13 |
| 1.5T                  | -0.083  | .015 | -5.68 | .000 | 96 | 19  | 37 |
| PM                    | -0.137  | .032 | -4.20 | .000 | 42 | 8   | 12 |
| <i>Mean Depth</i>     |         |      |       |      |    |     |    |
| 3T                    | -0.061  | .015 | -4.10 | .000 | 44 | 12  | 21 |
| 1.5T                  | -0.029  | .008 | -3.22 | .002 | 81 | 32  | 39 |
| PM                    | -0.053  | .022 | -2.41 | .019 | 35 | 12  | 15 |

**Colony***Surface Area*

|       |        |      |       |      |     |    |    |
|-------|--------|------|-------|------|-----|----|----|
| NCCC  | -0.155 | .026 | -5.92 | .000 | 97  | 19 | 39 |
| YNPRC | -0.083 | .015 | -5.68 | .000 | 100 | 13 | 23 |

*Mean Depth*

|       |        |      |       |      |    |    |    |
|-------|--------|------|-------|------|----|----|----|
| NCCC  | -0.061 | .015 | -4.10 | .000 | 87 | 31 | 37 |
| YNPRC | -0.029 | .008 | -3.22 | .002 | 73 | 25 | 38 |

**Sex***Surface Area*

|         |        |      |       |      |     |    |    |
|---------|--------|------|-------|------|-----|----|----|
| Males   | -0.155 | .026 | -5.92 | .000 | 97  | 14 | 32 |
| Females | -0.083 | .015 | -5.68 | .000 | 100 | 18 | 30 |

*Mean Depth*

|         |        |      |       |      |    |    |    |
|---------|--------|------|-------|------|----|----|----|
| Males   | -0.061 | .015 | -4.10 | .000 | 82 | 25 | 36 |
| Females | -0.029 | .008 | -3.22 | .002 | 78 | 31 | 39 |

**Rearing***Surface Area*

|    |       |      |       |      |    |    |    |
|----|-------|------|-------|------|----|----|----|
| MR | -.093 | .016 | -5.58 | .000 | 89 | 14 | 32 |
| NR | -.137 | .022 | -6.32 | .000 | 66 | 11 | 15 |
| WC | -.122 | .031 | -3.91 | .000 | 42 | 7  | 15 |

*Mean Depth*

|    |       |      |       |      |    |    |    |
|----|-------|------|-------|------|----|----|----|
| MR | -.037 | .011 | -3.15 | .001 | 73 | 29 | 33 |
| NR | -.051 | .014 | -3.52 | .001 | 53 | 15 | 24 |
| WC | -.048 | .017 | -2.76 | .007 | 34 | 12 | 18 |

---

**Table S2: Heritability estimates for the planum temporale (PT) of chimpanzees (N = 291)**

| Hemisphere          | $h^2$ | s.e. | p      | Covariates  | Variance |
|---------------------|-------|------|--------|-------------|----------|
| <b>Surface Area</b> |       |      |        |             |          |
| Overall (n = 291)   |       |      |        |             |          |
| Mean                | .217  | .107 | .008   | Sex         | .057     |
| Left                | .221  | .109 | .009   | Sex         | .039     |
| Right               | .215  | .105 | .006   | Sex         | .052     |
| AQ                  | .132  | .091 | .041   | None        |          |
| YNPRC (n = 136)     |       |      |        |             |          |
| Mean                | .061  | .134 | .312   | Sex         | .079     |
| Left                | .102  | .142 | .207   | Sex         | .072     |
| Right               | .112  | .148 | .197   | Sex         | .036     |
| AQ                  | .158  | .157 | .106   | None        |          |
| NCCC (n = 155)      |       |      |        |             |          |
| Mean                | .471  | .152 | .001   | Sex, Scan   | .086     |
| Left                | .332  | .158 | .009   | Sex, Scan   | .047     |
| Right               | .336  | .161 | .009   | Sex         | .069     |
| AQ                  | .000  | .500 | .500   | None        |          |
| <b>Mean Depth</b>   |       |      |        |             |          |
| Overall (n = 291)   |       |      |        |             |          |
| Mean                | .416  | .121 | .00008 | Sex         | .093     |
| Left                | .285  | .111 | .002   | Sex, Colony | .084     |
| Right               | .306  | .133 | .003   | Sex         | .072     |
| AQ                  | .034  | .110 | .373   | None        |          |
| YNPRC (n = 136)     |       |      |        |             |          |
| Mean                | .570  | .189 | .001   | Sex         | .039     |
| Left                | .336  | .199 | .024   | Sex         | .029     |
| Right               | .423  | .196 | .015   | Sex         | .047     |
| AQ                  | .000  | .500 | .500   | None        |          |
| NCCC (n = 155)      |       |      |        |             |          |
| Mean                | .332  | .153 | .005   | Sex, Age    | .173     |
| Left                | .333  | .141 | .004   | All         | .220     |
| Right               | .259  | .174 | .091   | Sex         | .091     |
| AQ                  | .285  | .207 | .062   | Scan        | .034     |

-----

**Table S3: Average planum temporale (PT) Surface Area and Mean Depth (+/- s.e.) for the Left and Right Hemisphere as a Function of Scanner Magnet Strength, Colony, Sex and Rearing History.**

**Scanner Magnet**

| <i>Surface Area</i> | <i>Left (s.e.)</i> | <i>Right (se)</i> |
|---------------------|--------------------|-------------------|
| 3T                  | 419.85 (13.43)     | 362.48 (13.85)    |
| 1.5T                | 434.07 (6.69)      | 400.12 (6.53)     |
| PM                  | 462.53 (13.59)     | 405.16 (13.71)    |
| <i>Mean Depth</i>   |                    |                   |
| 3T                  | 11.73 (0.18)       | 11.03 (0.18)      |
| 1.5T                | 12.01 (0.09)       | 11.68 (0.11)      |
| PM                  | 12.07 (0.24)       | 11.36 (0.29)      |

**Colony**

| <i>Surface Area</i> |               |               |
|---------------------|---------------|---------------|
| NCCC                | 438.59 (7.09) | 401.26 (6.68) |
| YNPRC               | 433.94 (9.43) | 380.08 (9.85) |
| <i>Mean Depth</i>   |               |               |
| NCCC                | 12.11 (0.09)  | 11.65 (0.11)  |
| YNPRC               | 11.76 (0.15)  | 11.21 (0.14)  |

**Sex**

| <i>Surface Area</i> |               |               |
|---------------------|---------------|---------------|
| Males               | 433.60 (8.52) | 385.94 (8.59) |
| Females             | 439.15 (7.90) | 396.61 (7.96) |
| <i>Mean Depth</i>   |               |               |
| Males               | 11.99 (0.12)  | 11.45 (0.14)  |

|         |              |              |
|---------|--------------|--------------|
| Females | 11.91 (0.12) | 11.43 (0.11) |
|---------|--------------|--------------|

## **Rearing**

### *Surface Area*

|    |                |                |
|----|----------------|----------------|
| MR | 442.64 (8.42)  | 401.58 (8.17)  |
| NR | 419.75 (10.14) | 370.71 (11.04) |
| WC | 447.26 (12.72) | 399.53 (12.16) |

### *Mean Depth*

|    |              |              |
|----|--------------|--------------|
| MR | 12.04 (0.12) | 11.63 (0.13) |
| NR | 11.75 (0.17) | 11.20 (0.13) |
| WC | 12.03 (0.17) | 11.40 (0.22) |

---
